# Supplementary material
Source: PubMed Central journal article supplement (PMC2707950)
Supplement: 109_2009_490_MOESM2_ESM.pdf [file 109_2009_490_MOESM2_ESM.pdf]

**Supplemental Table 1.** Minor allele frequencies (MAF) of the OSBPL2, -9, and -10 SNPs studied

| Gene           | SNP        | MAF<br>(low HDL) | MAF<br>(FCHL) |
|----------------|------------|------------------|---------------|
| <i>OSBPL2</i>  | rs6061461  | 0.458            | -             |
|                | rs3787432  | 0.213            | -             |
| <i>OSBPL9</i>  | rs6695853  | 0.148            | -             |
|                | rs12130751 | 0.211            | -             |
|                | rs11810827 | 0.138            | -             |
|                | rs768529   | 0.28             | -             |
|                | rs856614   | 0.388            | -             |
| <i>OSBPL10</i> | rs9878129  | 0.283            | 0.334         |
|                | rs9847800  | 0.487            | 0.423         |
|                | rs9853939  | 0.418            | 0.473         |
|                | rs7644177  | 0.432            | 0.455         |
|                | rs6807471  | 0.49             | 0.435         |
|                | rs9880436  | 0.457            | 0.47          |
|                | rs11709187 | 0.343            | 0.382         |
|                | rs2219250  | 0.245            | 0.292         |
|                | rs2045298  | 0.321            | 0.358         |
|                | rs2290531  | 0.464            | 0.46          |
|                | rs6803685  | 0.295            | 0.247         |
|                | rs1869849  | 0.253            | 0.184         |
|                | rs2013777  | 0.417            | 0.389         |
|                | rs3749405  | 0.42             | 0.387         |
|                | rs11058    | 0.254            | 0.213         |

**Supplemental Table 2.** Oligonucleotide primers for mRNA quantification by real-time RT-PCR

| <b>mRNA</b>        | <b>Forward primer 5'-3'</b>  | <b>Reverse primer 5'-3'</b> |
|--------------------|------------------------------|-----------------------------|
| ABCA1 <sup>a</sup> | GCACTGAGGAAGATGCTGAAA        | AGTTCCTGGAAGGTCTTGTTAC      |
| ABCG1              | CAGGAAGATTAGACACTGTGG        | GAAAGGGGAATGGAGAGAAGA       |
| ABCG5              | TCTCTGGCCCCCACTTA            | CTATATTTGGATTTTGGACGATACCA  |
| SREBP-1a           | TGCTGACCGACATCGAAGAC         | CCAGCATAGGGTGGGTCAA         |
| SREBP-1c           | TCAGCGAGGCGGCTTTGGAGCAG      | CATGTCTTCGATGTCGGTCAG       |
| SREBP-2            | CCGCTGTTCCGATGTACAC          | TGCACATTCAGCCAGGTTCA        |
| LXR $\alpha$       | CTTGCTCATTGCTATCAGCATCTT     | ACATATGTGTGCTGCAGCCTCT      |
| LXR $\beta$        | GGCGAGGGTGTCCAGCTAA          | CGGAGAAGGAGCGTTTGTG         |
| FAS                | AACTCCAAGGACACAGTCACCAT      | CAGCTGCTCCACGAACTCAA        |
| SCD-1              | TTGGAGAAGCGGTGGATAAC         | AAAAATCCCACCCAATCACA        |
| HMG-CoAR           | ACAATAAGATCTGTGGTTGGAATTATGA | GCTATGCATCGTGTTATTGTCAGAA   |
| LDLr               | CCCTGCTTGTTTTCTCTGG          | TGCAGTTTCCATCAGAGCAC        |
| Insig-1            | CCCAGATTCCTCTATATTCGTTCTT    | CACCCATAGCTAACTGTCGTCCTA    |
| Insig-2            | TGTCTCTCACACTGGCTGACTA       | CTCCAAGGCCAAAACCACTTC       |
| $\beta$ -actin     | GACAGGATGCAGAAGGAGATT        | TGATCCACATCTGCTGGAAGG       |

<sup>a</sup>Abbreviations: ABC, ATP-binding cassette transporter; SREBP, sterol regulatory element binding protein; LXR, liver X receptor; FAS, fatty acyl synthetase; SCD-1, stearoyl coenzyme A desaturase-1; HMG-CoAR, 3-hydroxy-3-methylglutaryl coenzyme A reductase; LDLr, low-density-lipoprotein receptor; Insig, insulin-induced gene
