# Supplementary material
Source: PubMed Central journal article supplement (PMC2707950)
Supplement: 109_2009_490_MOESM3_ESM.pdf [file 109_2009_490_MOESM3_ESM.pdf]

## **Low-HDL Families**

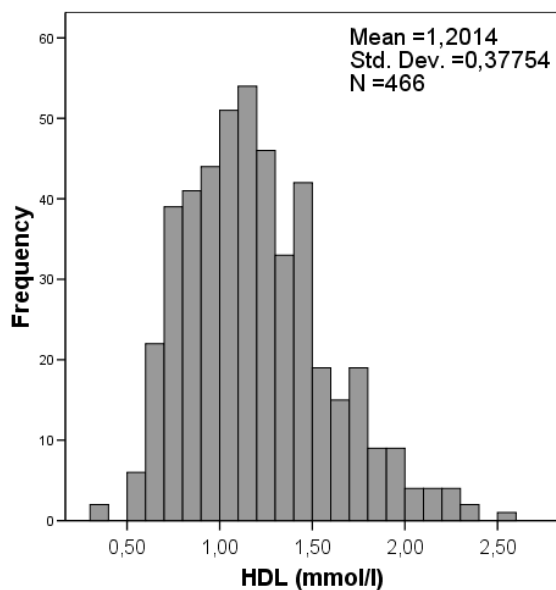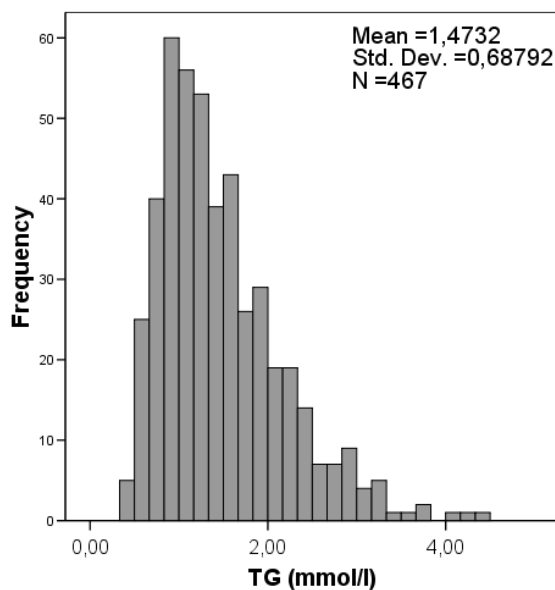

## **FCHL Families**

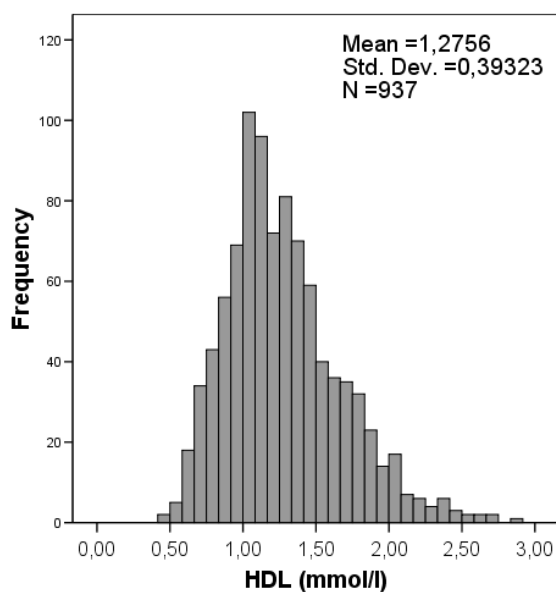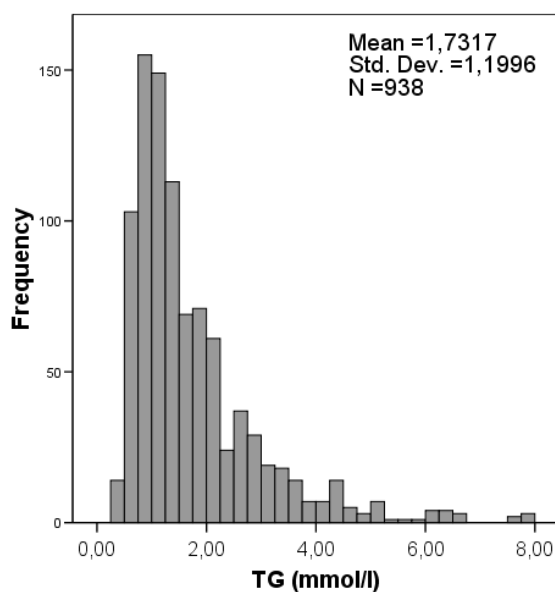

**Supplemental Fig. 1** Distribution of the serum HDL-cholesterol (HDL) and triglyceride (TG) values among subjects from the low-HDL and FCHL families. The top panels, subjects from the low-HDL pedigrees; The bottom panels, subjects from the FCHL pedigrees. The mean value, standard deviation and the number of subjects (N) are indicated in the upper right-hand corner of each panel.

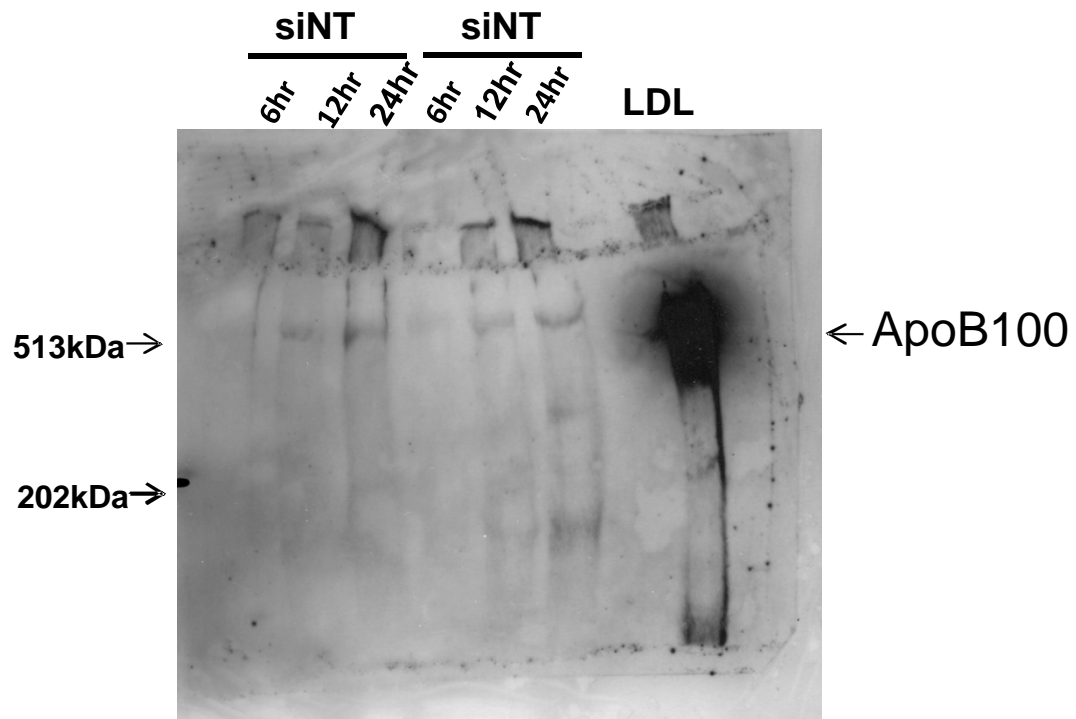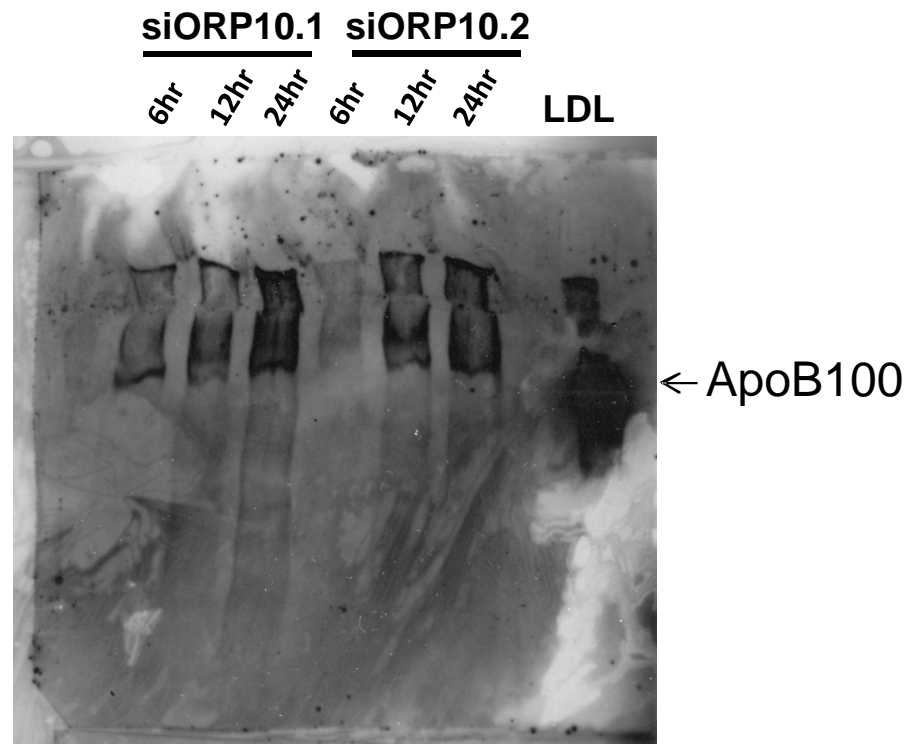

**Supplemental Fig. 2** Western analysis of ApoB100 in the growth medium of Huh7 cells treated with non-targeting (siNT) or ORP10-specific siRNAs. Aliquots of the serum-free medium collected at the indicated time points were resolved on 4% SDS-PAGE, blotted onto Hybond-C Extra (Amersham) filter and probed with rabbit anti-apoB100 (ECL detection). The two gels were electrophoresed, blotted, and detected in parallel and the ECL was exposed on the same film. The result is representative of three independent experiments. The lane labeled LDL contained human LDL used as ApoB100 mobility marker (513 kDa).
